# Supplementary material
Source: PubMed Central journal article supplement (PMC37502)

A.

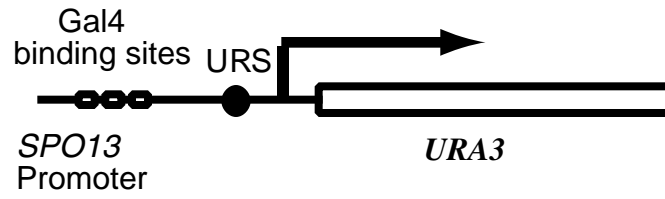

B.

### 5-FOA Plate

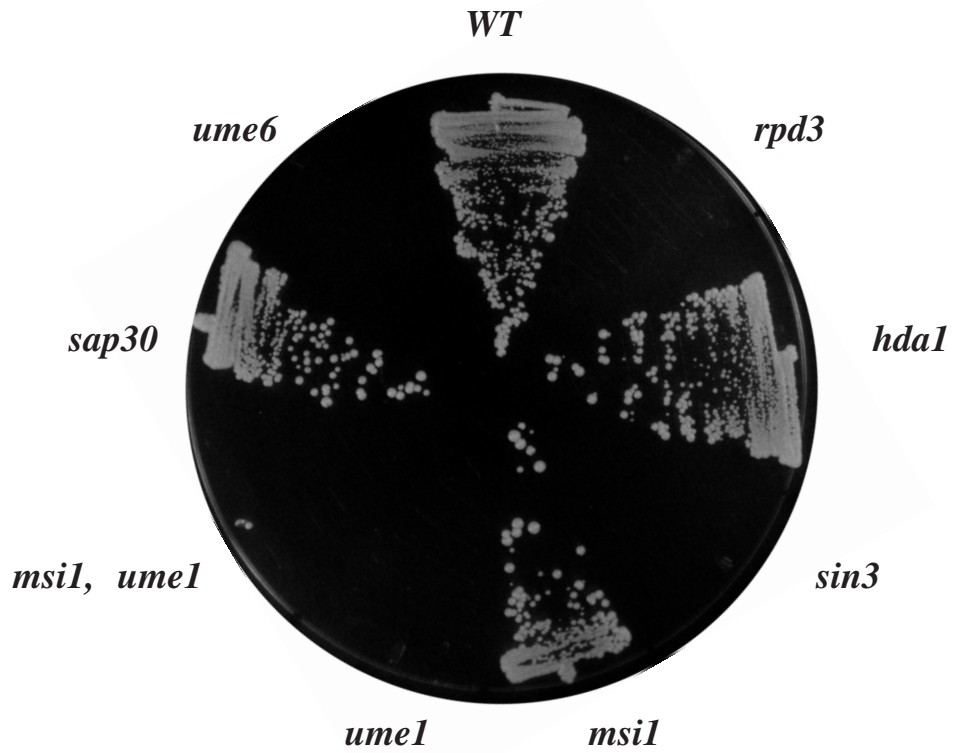

Supplement: pnas_151240898_2.pdf [file pnas_151240898_2.pdf]
